1 Isolation and characterization of novel temperate virus *Aeropyrum* globular virus 1 infecting  
2 hyperthermophilic archaeon *Aeropyrum*

3

4 Maho Yumiya<sup>a</sup>, Yuto Fukuyama<sup>b</sup>, Yoshihiko Sako<sup>c</sup>, Takashi Yoshida<sup>c#</sup>

5 <sup>a</sup>Institute for Advanced Co-Creation Studies, Research Institute for Microbial Diseases, Osaka  
6 University, Yamadaoka, Suita, Osaka, Japan

7 <sup>b</sup>Research Center for Bioscience and Nanoscience, Japan Agency for Marine-Earth  
8 Science and Technology, Natsushima-cho, Yokosuka, Kanagawa Japan

9 <sup>c</sup>Laboratory of Marine Microbiology, Graduate School of Agriculture, Kyoto University,  
10 Kitashirakawa Oiwake-cho, Sakyo-ku, Kyoto Japan

11

12 Running title: Novel temperate virus infecting *Aeropyrum*

13

14 #Address correspondence to Takashi Yoshida

15 [yoshida.takashi.7a@kyoto-u.ac.jp](mailto:yoshida.takashi.7a@kyoto-u.ac.jp)

16

17 Abstract word count:216

18 Word count for the main text:5673

19

20

21

22

23

24

25

## 26 **ABSTRACT**

27 We isolate a novel archaeal temperate virus named *Aeropyrum* globular virus 1 (AGV1) from the  
28 host *Aeropyrum* culture. Reproduction of AGV1 was induced by adding 20 mM tris-acetate buffer  
29 to exponentially growing host cells. Negatively stained virions showed spherical morphology ( $60$   
30  $\pm 2$  nm in diameter) similar to *Globuloviridae* viruses. The double-stranded circular DNA genome  
31 of AGV1 contains 18,222 bp encoding 34 open-reading frames. No ORFs showed significant  
32 similarity with *Globuloviridae* viruses. AGV1 shares three genes, including an integrase gene, with  
33 reported spindle-shaped temperate viruses. However we couldn't detect its integration site in the  
34 host genome. Moreover AGV1 seemed not to replicate autonomously because there are no origin  
35 recognition boxes in the genome. qPCR results showed that the genome copy number of AGV1  
36 was lower than that of the host genome ( $10^{-3}$  copies per host genome). Upon the addition of tris-  
37 acetate buffer, a steep increase in the AGV1 genome copy number (9.5–26 copies per host genome  
38 at 2 days post-treatment) was observed although clustered regularly interspaced short palindromic  
39 repeat (CRISPR) elements of the host genome showed significant matches with AGV1  
40 protospacers. Our findings suggest that AGV1 is a novel globular virus exhibiting an unstable  
41 carrier state in the growing host and in that way AGV1 can escape from the host defense system  
42 and propagate under stressful host conditions.

43

44

## 45 **Importance**

46 Studying archaeal viruses yields novel insights into the roles of virospheres and viruses in the  
47 evolutionary process of their hosts. Here, we isolated a novel spherical virus named *Aeropyrum*

48 globular virus 1. AGV1 has integrase gene but its genome is not integrated into the host genome.  
49 AGV1 could not replicate autonomously due to the lack of origin recognition boxes and thus its  
50 copy number was too low ( $10^{-3}$  copies per host genome) without any inducing stimulus. However,  
51 upon the addition of tris-acetate buffer, the AGV1 genome copy number steeply increased instead  
52 of a perfect sequence match between the spacer of the host CRISPR/Cas system and the  
53 protospacer. Our findings suggest that AGV1 can escape from the host defense system and  
54 propagate under stressful conditions for the host by establishing an unstable carrier state. These  
55 results reveals a novel aspect of host–virus interactions in extreme environments.

56

57

## 58 **INTRODUCTION**

59 Viruses are absolute intracellular parasites that depend on their host living organisms for  
60 replication(1, 2). Through infection, viruses can introduce genetic variation to the host  
61 microorganisms (3), affect their host microbial metabolism (4), directly kill their hosts by cell lysis,  
62 and accordingly contribute to the diversification of the microbial community (5). Virus–  
63 microorganism interactions also drive antagonistic coevolution that increases genetic diversity of  
64 both hosts and viruses (2). Thus, viruses are key players in microbial ecology (6).

65

66 Most *Crenarchaeota* members are hyperthermophiles that grow optimally at temperatures of at  
67 least 80°C. According to the International Committee on Taxonomy of Viruses, to date, cultured  
68 crenarchaeal viruses have been identified in 13 genera, such as *Sulfolobus*, *Acidianus*, *Stygiolobus*,  
69 *Thermoproteus*, *Pyrobaculum*, and *Aeropyrum* (7). Crenarchaeal viruses exhibit diverse  
70 morphologies, including spindle-shaped and bottle-shaped cells, which have never been reported

71 in other domains of life (7-9). The life cycles of viruses are largely divided into lytic and lysogenic  
72 cycles (10). However, to adapt to the harsh conditions of the host habitat, crenarchaeal viruses,  
73 except for lytic viruses, e.g., *Thermoproteus tenax* virus 1 (11), *Sulfolobus* turreted icosahedral  
74 virus (12) and *Acidianus* two-tailed virus (13), do not exhibit typical lytic cycles and develop a  
75 carrier state in their host. Viruses in carrier state represent a harmonious coexistence with host  
76 species and propagate without genome integration and cell lysis (8). It is considered that carrier  
77 state is unique and significant strategy for viruses infecting *Crenarchaeota*. All members of  
78 *Fuselloviridae* (14), *Guttaviridae* (15, 16), and *Bicaudaviridae* (13) are lysogenic viruses and  
79 possess integrase genes. Some of them can not only integrate their circular genome into host  
80 chromosomes (17) but also establish carrier state. The archaeon *Sulfolobus shibatae* B12 is the  
81 natural host of the fusellovirus *Sulfolobus* spindle-shaped virus 1 (SSV1), which exists in episomic  
82 and integrated forms. SSV1 can propagate at low levels ( $10^7$  virus particles/mL) without cell lysis  
83 and even in the absence of an inducing stimulus (18). Thus, its lysogenic cycle is a model of carrier  
84 state (19). Transcriptomic analysis of SSV1-infected cells suggests that the virus tightly represses  
85 gene expression during its carrier state to establish an equilibrium between viral replication and  
86 cellular multiplication (20). However, owing to the limited number of cultured viruses and unique  
87 genomic contents, knowledge on the mechanisms and the ecological effects of the carrier state is  
88 limited.

89

90 Belonging to the phylum *Crenarchaeota*, *Aeropyrum* spp. are aerobic, neutrophilic, and  
91 heterotrophic hyperthermophiles (21). There are only two closely related *Aeropyrum* species,  
92 *Aeropyrum pernix* (21) and *Aeropyrum camini* (22). Four viruses that infect *A. pernix* have been  
93 isolated and described: *Aeropyrum pernix* bacilliform virus 1 (APBV1) (23), *Aeropyrum pernix*

94 ovoid virus 1 (APOV1) (15), *Aeropyrum pernix* spindle-shaped virus 1 (APSV1) (15), and  
95 *Aeropyrum* coil-shaped virus (ACV) (24). APBV1 and ACV are the first members of Clavaviridae  
96 and Spiraviridae, respectively (23, 24). Further diversity in *A. pernix* viruses was predicted to have  
97 been still veiled in hot environments by transmission electron micrograph (TEM) observations  
98 (e.g., filamentous virus and short bacilliform virus) (23). *Aeropyrum* species are specialists in their  
99 habitat requirements and possess small and very conservative genomes (25). Genomic variation is  
100 observed in virus-related elements including two proviral regions (*Fuselloviridae* APSV1 and  
101 *Guttaviridae* APOV1), adaptive immune system against foreign genetic elements (clustered  
102 regularly interspaced short palindromic repeat [CRISPR]), and ORFans probably originating from  
103 viruses (25). In addition, most spacer sequences (141/144) in the CRISPR loci of *A. pernix* K1 and  
104 *A. camini* SY1 showed no similarity to databases (25). It is considered that their genomic  
105 diversification is mostly derived from viruses and that there are unknown viruses interacting with  
106 *A. pernix* and contribute to their population dynamics in the environment.

107 Here, we report the isolation of a novel temperate virus infecting *Aeropyrum* species and  
108 investigate how the virus establish its unique carrier state in the host culture using quantitative  
109 PCR assay.

110

## 111 **MATERIALS AND METHODS**

112 **Sample collection.** On December 12, 2012 and May 27, 2014, samples were collected from the  
113 Yamagawa coastal hydrothermal field (31°10'58" N, 130°36'59" E) in the Kagoshima Prefecture.  
114 Effluent seawater and coastal sand were collected using a ladle and stored in 50 mL centrifuge  
115 tubes (Greiner Bio-One, frickenhausen, Germany). All tubes were transported in ice packs to the  
116 laboratory by a refrigerated courier service (Yamato Transport, Tokyo, Japan) and stored at 4°C

117 until use.

118

119 **Isolation of the host strain.** To establish the enrichment culture of *A. pernix*, approximately 0.5 g  
120 sample collected from 2012 was inoculated into the 5 mL JXTm medium (1 g tryptone, 1 g yeast  
121 extract, 28.15 g NaCl, 0.67 g KCl, 5.51 g MgCl<sub>2</sub>·6H<sub>2</sub>O, 6.92 g MgSO<sub>4</sub>·7H<sub>2</sub>O, 1.45 g CaCl<sub>2</sub>, and 1  
122 g Na<sub>2</sub>S<sub>2</sub>O<sub>3</sub>·5H<sub>2</sub>O per liter, pH 7.0) (26) in 18 × 180 mm hermetically sealed screw-cap test tubes.  
123 The cultures were incubated at 90°C in a dry oven (FC612 or DRS620DB; ADVANTEC, Tokyo,  
124 Japan) under atmospheric conditions. Then, the enriched cells were streaked onto a ST Gelrite  
125 plate (containing 32 g of sea salt (Sigma Aldrich, St. Louis, Missouri, USA), 1 g Na<sub>2</sub>S<sub>2</sub>O<sub>3</sub> 5H<sub>2</sub>O,  
126 0.8 g yeast extract (Becton, Dickinson and Company, Franklin Lakes, New Jersey), 1.2 g tryptone  
127 (Becton, Dickinson and Company, Franklin Lakes, New Jersey, USA), and 8 g Gelrite gellan gum  
128 (Sigma Aldrich, St. Louis, Missouri, USA) per liter) in glass Petri dishes (10 cm in diameter). The  
129 plates were incubated at 90°C in a BBL GasPak™ 100 Holding Jar (Becton, Dickinson and  
130 Company, Franklin Lakes, New Jersey, USA) to avoid evaporation. After 3 to 5 days of incubation,  
131 well-isolated colonies formed on the surface of the plates were collected and transferred to a fresh  
132 JXTm medium. To ensure the purity of the *Aeropyrum* isolate, the streaking and isolation steps  
133 were repeated at least three times, and the 16S rRNA gene sequences and four housekeeping genes  
134 (*pheS*, *radA*, *gap*, and *ast*) were confirmed using Sanger sequencing performed using a BigDye  
135 Terminator v3.1 Cycle Sequencing Kit on Applied Biosystems 3130 genetic analyzer  
136 (ThermoFisher Scientific, Waltham, Massachusetts, USA). The isolate was designated as the host  
137 strain, *A. pernix* YK1-12-2013.

138

139 **Virus culture and isolation.** Approximately 5 g sample collected in 2014 were inoculated into

140 fresh 1,000 mL JXTm medium in 2000 mL Erlenmeyer flasks sealed with silicone plug and  
141 incubated as described above. After 3 days, samples were centrifuged at  $5,000 \times g$  for 30 min in  
142 500-ml Nalgene™ PPCO centrifuge bottles (ThermoFisher Scientific, Waltham, Massachusetts,  
143 USA) at 4°C, and NaCl and polyethylene glycol 6000 were added to the supernatant (final  
144 concentration: 1 M and 10%, respectively). After incubation at 4°C overnight, viral particles were  
145 collected by centrifugation at  $12,000 \times g$  for 30 min at 4°C and suspended in 10 mL virus storage  
146 buffer (20 mM Tris-acetate at pH 7.0 containing 3.0% sodium chloride) and designated as the  
147 environmental virus fraction.

148 To screen viruses infecting *A. pernix* YK1-12-2013, we inoculated the 10 mL  
149 environmental virus fraction with 1,000 mL exponentially growing *A. pernix* YK1-12-2013 culture  
150 in 2000 mL Erlenmeyer flasks. As a control and mock treatment, we added virus suspension buffer  
151 and JXTm medium to the culture medium. Viral fractions were prepared as described above after  
152 further growth for approximately four days. Virus propagation was verified using transmission  
153 electron microscopy (TEM) as described below. For further purification, 10 mL chloroform was  
154 added. After vigorous vortexing, the suspension was centrifuged ( $7,500 \times g$ , 4°C, 20 min), and the  
155 aqueous layer was layered on a CsCl step-gradient (1.15, 1.25, and 1.40 g ml<sup>-1</sup>) and purified by  
156 CsCl step-gradient ultracentrifugation at  $107,000 \times g$  for 60 min at 15°C using a Beckman Coulter  
157 Optima L-80 ultracentrifuge, SW41Ti rotor (Beckman Coulter Inc, Brea, California, USA). The  
158 concentrated viruses were collected using a 26-gauge needle and dialyzed in 500 mL SM buffer  
159 (50 mM Tris-HCl, 100 mM NaCl, 10 mM MgSO<sub>4</sub> · 7H<sub>2</sub>O, 0.01% gelatin) at 4°C overnight.

160

161 **TEM analysis.** For negative staining, 5 µL samples were applied to carbon-coated copper grids  
162 (Nisshin EM, Tokyo, Japan) stained with 2% uranyl acetate for 5–10 s. They were visualized using

163 an H-7650 (Hitachi, Tokyo, Japan) at 80 kV at magnifications of 10,000× to 40,000×.

164

165 **DNA extraction, sequencing, and host and viral genome assembly** Extraction of cellular DNA  
166 and viral DNA was conducted using Wizard® Genomic DNA Purification Kit (Promega, Madison,  
167 Wisconsin, USA) and QIAamp MinElute viral DNA extraction kit (QIAGEN, Venlo, Netherland),  
168 respectively, following the manufacturer's protocol. The sequencing library was prepared using a  
169 Nextera XT library preparation kit (Illumina, San Diego, California, USA), and genomes were  
170 sequenced on the Illumina MiSeq v2 system with paired-end reads. The sequence of the viral  
171 genome was technically replicated ( $n = 2$ , defined as VL1 and VL2). We eliminated the reads with  
172 a Phred score below Q30 for 90% of the bases using the FASTQ Quality Filter of FASTX-Toolkit  
173 ([http://hannonlab.cshl.edu/fastx\\_toolkit/](http://hannonlab.cshl.edu/fastx_toolkit/)). The reads were assembled using the Velvet Optimiser  
174 ver. 2.2.5 (<http://bioinformatics.net.au/software/velvetoptimiser.shtml>) (27).

175 To obtain the complete viral genome, VL1 and VL2 were assembled. We searched for  
176 homologous sequences between the VL1-contigs and VL2-contigs using the BLASTN program at  
177 the National Center for Biotechnology Information (NCBI) and assembled the contigs sharing  
178 significant homologous sequences using MEGA7 (28). If the length of the homologous sequence  
179 was less than 200 bp, the integrity of the assembly was confirmed using PCR. Finally, the gaps  
180 between the contigs were bridged using Sanger sequencing of the PCR products.

181

182 **Genome analysis.** Open reading frames (ORFs) were predicted using the Microbial Genome  
183 Annotation Pipeline (MiGAP) (29) following manual curation. To determine the homology of  
184 ORFs to known proteins, we searched for non-redundant database protein sequences in the NCBI  
185 database using BLASTP (as of March 2021,  $E = 1e-5$ ). Searches for conserved protein domains



186 were performed using HMMscan (30) against Pfam (31) (as of March 2021.  $E = 1e-5$ ). Membrane-  
187 spanning regions were predicted using the TMHMM ver. 2.0  
188 (<http://www.cbs.dtu.dk/services/TMHMM/>) (32). Circular genome maps and GC skew  
189 calculations were performed using DNAPlotter (33). Genome alignments with related viruses  
190 based on genome-wide sequence similarities computed by tBLASTx were drawn using ViPTree  
191 web server version 1.9 (<http://www.genome.jp/viptree/>) (34).

192 To determine the AGV1-integration site in the host genome, we searched for homologous  
193 sequences between the virus genome and the *A. pernix* YK1-12-2013 draft genome using BLASTN.  
194 To ensure high sensitivity, sequence reads of the host were mapped onto the viral genome using  
195 Bowtie2 (35). The CRISPR elements and spacers were identified using CRISPRFinder (36) with  
196 manual validation. The virus genome was searched against the spacers registered in the CRISPRs  
197 database (as of March 2021) and the identified spacers of *A. pernix* YK1-12-2013 using BLASTN  
198 optimized for somewhat similar sequences.

199  
200 **Protein analysis of virus.** Purified virions were incubated at 95°C for 20 min with the buffer  
201 solution without the reducing reagent (6x) and subjected to SDS-PAGE (12% polyacrylamide gel;  
202 80 × 90 × 1.0 mm; 200V; Nacalai Tesque, Kyoto, Japan) using ATTO AE-6450 mini PAGE system  
203 (ATTO, Tokyo, Japan). Proteins were transferred onto an Immobilon P membrane (Millipore,  
204 Burlington, Massachusetts, USA) using TRANS-BLOT SD SEMI DRY TRANSFER CELL (Bio-  
205 Rad, Hercules, California, USA) at 180 mA for 80 min and stained with CBB Stain One (Nacalai  
206 Tesque, Kyoto, Japan). A protein ladder (Nacalai Tesque, Kyoto, Japan) with molecular masses  
207 ranging from 10 to 250 kDa was used. The major protein band was excised using a scalpel, and  
208 the N-terminal amino acid sequence was determined by Edman degradation (APRO Science,

209 Tokushima, Japan).

210

211 **Growth kinetics analysis of virus.** We monitored the cellular (16S rDNA) and viral (integrase)  
212 genome copy numbers using qPCR. *A. pernix* YK1-12-2013 (1,000 mL culture) was grown in  
213 2,000 mL Erlenmeyer flasks sealed with silicone plugs at 90°C without shaking. After 24 h  
214 incubation, 10 mL viral fraction or virus storage buffer (control; 20 mM Tris-acetate at pH 7.0  
215 containing 3.0% sodium chloride) was added to *A. pernix* YK1-12-2013 cultures, and 10 mL was  
216 sampled every 24 h. For each sample, *A. pernix* YK1-12-2013 was collected as described above.  
217 Virions were collected by ultracentrifugation at 25,000 rpm for 90 min at 4°C using a Beckman  
218 Coulter Optima L-80 ultracentrifuge, SW41Ti rotor. Cellular DNA and viral DNA were extracted  
219 from the cell-free supernatant by using kits as described above, and qPCR was performed for  
220 quantification. For the archaeal 16S rRNA gene, primer sets 931f-m1100r were used (37). The  
221 primers for the viral integrase gene were designed to target the 226-bp internal region of the  
222 integrase gene (Table 1). Standards used to determine the gene copy numbers of the 16S rRNA  
223 and integrase genes were prepared using the genomic DNA from *A. pernix* YK1-12-2013 and the  
224 purified virus, respectively. qPCR was performed using SYBR Premix Ex Taq II (Tli RNaseH  
225 Plus) (TaKaRa Bio, Shiga, Japan) on a TaKaRa PCR thermal cycler Dice® real-time system single  
226 and software. Thermal cycler Dice Real Time System Single (ver. 4.02 B for TP850) was used for  
227 the calculation of Ct values, generation of standard curves, and analysis of dissociation curves.  
228 Each PCR mixture (20 µL per tube) contained primers and SYBR® Green I solution of the  
229 recommended concentration according to the manufacturer's guidelines. The PCR protocol for  
230 16S rRNA genes was as follows: 60 s at 95°C for initial denaturation, 45 cycles of 5 s at 95°C, 10  
231 s at 64°C, and 30 s at 72°C. The PCR protocol for integrase genes was as follows: 60 s at 95°C for

232 initial denaturation, 45 cycles of 10 s at 95°C, 15 s at 61°C, and 40 s at 72°C. Dissociation curves  
233 were generated by gradually increasing the temperature from 60°C to 95°C after the PCR cycle.

234

235 **Growth analysis of host.** The effect of viral infection on *A. pernix* YK1-12-2013 growth was  
236 confirmed using culture-turbidity measurements. Briefly, 100 µL AGV1 fraction, virus storage  
237 buffer, or JXTm was added to exponentially growing host cells in 5 mL culture in 18 × 180 mm  
238 hermetically sealed screw-cap test tubes. Every 8 h, 100 µL of culture was collected, and OD<sub>600</sub>  
239 was measured using Ultrospec 3100 pro (GE Healthcare, Chicago, Illinois, USA).

240

241 **Virus induction assay.** Cells were grown in 5 mL culture in 18 ml screw-capped test tubes at 90°C  
242 without shaking for 24 h. To determine the factor inducing AGV1 replication, we performed stress  
243 treatments on *A. pernix* YK1-12-2013 cultures. First, pH was changed from 7.0 to 6.0 by adding  
244 3M acetate. Second, exponentially growing host cells were transferred to shallow plastic dishes  
245 and subjected to UV irradiation at 254 nm for 30 s using a BioRad GS gene linker (BioRad,  
246 Hercules, California, USA). Third, we shifted the cultivation temperature from 90°C to 80°C.  
247 Fourth, 100 µL 5 M NaCl was added. Lastly, 100 µL 0.25 M EDTA (pH 7.0) was added. For each  
248 culture, cells were collected 48 h post-treatment, and cellular DNA was extracted and used as a  
249 PCR template to confirm AGV1 induction.

250

251 **Host range analysis.** Host analysis was conducted using the following strains: *A. pernix* K1 and  
252 *A. camini* SY1 obtained from the Deutsche Sammlung von Mikroorganismen und Zellkulturen  
253 (DSMZ, Braunschweig, Germany) as DSMZ 11879 and DSMZ 16960, respectively, and three *A.*  
254 *pernix* laboratory strains isolated from various hydrothermal fields: OH2, TB7 (26), and FT1-29-

255 2014 (from Shimogamo hot spring, Shizuoka, Japan).

256 Each strain was inoculated with 100  $\mu$ L AGV1 fraction growing in 5 mL medium JXTm  
257 (defined as culture A) for 2 d. Then, 100  $\mu$ L culture A was transferred to 5 mL fresh medium and  
258 incubated for another 2d twice (defined as cultures B and C). Genomic DNA was extracted from  
259 cultures A, B, and C per strain. Using these DNA templates, qPCR was performed using AGV1-  
260 specific primers to confirm infection. PCR using 16S rRNA-specific primers was used as the  
261 control.

262

263 **Data availability.** The AGV1 genome and *A. pernix* YK1-12-2013 draft genome sequences have  
264 been deposited in the DNA Data Bank of Japan (DDBJ) database under the accession numbers  
265 LC208019 and BDMD01000001-BDMD010000144, respectively.

266

## 267 **RESULTS & DISCUSSION**

268 **Isolation of novel temperate virus.** An enrichment culture was established from samples  
269 collected from a hydrothermal field in Kagoshima, Japan, wherein *Aeropyrum* species and their  
270 infectious viruses have been previously isolated (26). From the TEM images, we observed spindle-  
271 shaped, pleomorphic, and linear virus-like particles in a viral fraction prepared from the  
272 enrichment culture (data not shown). To isolate the infectious viruses of *A. pernix*, the viral fraction  
273 was inoculated with *A. pernix* YK1-12-2013. After 4 days, host growth retardation was detected,  
274 and spherical particles approximately  $60 \pm 2$  nm in diameter were observed in viral fractions from  
275 the cultures inoculated with virus fraction. And the same particles were also observed in viral  
276 fraction from culture added with virus storage buffer (Figs. 1). No virus-like particles were  
277 observed in the supernatant of *A. pernix* YK1-12-2013 cell culture without viral fraction or virus

278 storage buffer. These observations indicate that the spherical viral particles are derived from a  
279 temperate virus (or viruses) within the *A. pernix* YK1-12-2013 strain.

280 The spherical virions are morphologically similar to those belonging to the *Globuloviridae*  
281 family, i.e., *Pyrobaculum* spherical virus 1 (38) and *Thermoproteus tenax* spherical virus 1 (39).  
282 Neither surface structures nor tails were observed. As there has been no reports to date on a  
283 spherical virus infecting *Aeropyrum* and we successfully obtained a single circular genome from  
284 these spherical virions later, we described these isolates as a novel virus species infecting  
285 *Aeropyrum* named *Aeropyrum* globular virus 1 (AGV1).

286

287 **AGV1 genomic features of and host genomic interactions.** A single circular dsDNA genome  
288 containing 18,222 bp (Fig. 2A and Table 2) was assembled from spherically shaped particles. We  
289 numbered the nucleotides in the genome sequence beginning from the start codon of the first ORF  
290 following the replication origin. The ORFs are correspondingly numbered and the following  
291 number refers to the number of amino acids in the predicted protein (e.g. ORF1\_309). The GC  
292 content (55.8%) was similar to those of host chromosomes (50.7–56.7%) (25) and the reported  
293 dsDNA viruses infecting *A. pernix* (52.7–56.5%) (15, 23) ) but higher than those of other spherical  
294 viruses PSV (48%) (38) and TTSV (49.8%) (39). The AGV1 genome encoded 34 predicted ORFs  
295 starting from the ATG, GTG, and TTG codons (Table 3). Of these, 27 (79.4%) were present in one  
296 DNA strand, and only 7 were present on the other. The GC skew analysis revealed that the origin  
297 of replication is most likely located in the intergenic region between ORF 1\_309 and ORF 34\_215.  
298 We detected an inverted repeat, 5' -CACCCCTGCTCTACTATAGTCTAT – N<sub>93</sub>–  
299 ATAGACTCTATAGTAGAGCCAGGGTG –3' in this region. The *oriC* sites on the *A. pernix* K1  
300 genome contain crenarchaeal origin recognition boxes (ORBs) which are the binding sites for

301 Orc1/Cdc6 proteins and ori-specific uncharacterized motifs (UCMs), an important signature motif  
302 in the center of origin in *Aeropyrum* (40). We did not find any ORBs or UCMs around the putative  
303 replication origin on the AGV1 genome, suggesting that AGV1 cannot replicate autonomously.  
304 Of the predicted ORFs, 10 (29.4%) showed significant similarity to the genes in the nr database  
305 (Table 3). SDS-PAGE revealed a single major protein band of approximately 28.5 kDa from the  
306 protein fraction extracted from purified AGV1 virions (Fig. 2B), 5 N-terminal amino acid  
307 sequences of which completely matched with the internal amino acid sequences of a protein  
308 encoded by AGV1 ORF1\_309. According to the HMMscan (30) analysis, 12 (35.3%) ORFs  
309 showed similarity to the protein domains registered in the Pfam database (31). We collectively  
310 assigned functions to these 13 AGV1 gene products (Fig. 2A, Table3).

311 PSV1 and TTSV1, the reported members of *Globuloviridae*, share 15 genes including two  
312 structural proteins (39). Although AGV1 virions are morphologically similar to PSV1 and TTSV1,  
313 the structural protein of AGV1 showed no similarity with those of PSV1 and TTSV1. Moreover,  
314 no homologs were found on the AGV1 genome. The five AGV1 genes showed significant  
315 similarities with those of reported crenarchaeal temperate viruses. Particularly, three of the five  
316 genes are similar to that in Fuselloviruses, namely integrase (ORF 26\_339) in the SSV-like region  
317 on *Sulfolobus islandicus* M.16.4, nuclease (ORF 21\_191) in SSV2, and putative transcriptional  
318 regulator (ORF 22\_70) in APSV1. Integrase genes found in archaeal extrachromosomal elements  
319 are classified into two types: SSV1-type and pNOB8-type (40). AGV1 integrase is an SSV1-type  
320 integrase, a kind of tyrosine recombinase catalyzing the site-specific integration and excision of  
321 the viral genome (40). HMMS revealed that the functional domain was conserved in the integrase  
322 gene. We found that the tRNA<sup>Glu</sup> gene was inserted in the AGV1 integrase gene sequence,  
323 suggesting that tRNA<sup>Glu</sup> is the integration site of the integrase. Furthermore, ORF22\_70 products

324 encoded a putative DNA-binding protein containing the ribbon-helix-helix (RHH) domain  
325 common to the CopG family. This domain was also predicted for the ORF15\_146 product. The  
326 RHH domain protein is one of the most conserved proteins in archaeal viruses (41) and recognizes  
327 target sequences in the DNA by forming dimers and inserting them into the groove (42). The RHH  
328 domain was also found in F55, which tightly regulates the SSV1 lysogenic state (20) and is  
329 involved in controlling plasmid copy numbers (42).

330 Four ORFs of AGV1 were homologs of *Aeropyrum*-encoded genes, three of which  
331 (ORF18\_111, ORF22\_70, and ORF31\_258) are shared with the provirus on the *A. pernix* K1  
332 genome. AGV1 shares a hypothetical protein (ORF18\_111) and putative glutamyl tRNA<sup>Glu</sup>  
333 reductase (ORF31\_258) with APOV1.

334 Five ORFs showed sequence similarity to those of other hyperthermophilic crenarchaeota,  
335 including trypsin-like peptidase (ORF4\_262), nuclease (ORF21\_191), and ATP-binding  
336 protein (ORF28\_309) in *Pyrodictium* sp.; pillin (ORF 20\_141) in *Thermogladius calderae*; and  
337 hypothetical protein (ORF33\_330) in *Thermoprotei archaeon*. Trypsin-like peptidase is also  
338 encoded by the ssDNA virus ACV (24) and might be involved in the release or invasion cycle of  
339 these viruses.

340 ORF28\_309 exhibited a P-loop containing region of the AAA domain, which is conserved  
341 among the ATP- or GTP-binding proteins and is encoded by many archaeal viruses (43). Typically,  
342 viral P-loop proteins are nucleic-acid-stimulated ATPases that are involved in viral replication,  
343 transcription, or packaging and are related to bacterial DnaA (43). We found that 13 ORFs,  
344 including structural proteins and pilli, exhibit one to four transmembrane motifs predicted by the  
345 TMHMM 2.0 program.

346 Finally, we compared the AGV1 genome with those of related crenarchaeal viruses on a

347 genome-wide scale using ViPTree (34). AGV1 shared some genes with APOV1 and *Fuselloviridae*  
348 members, but most of its genomic content was unique, indicating the novelty of AGV1. The  
349 genome architecture of AGV1 showed mosaicism, which may reflect the genetic exchange among  
350 other viruses and organisms. Genome mosaicism of viruses has been reported between bacterial  
351 phages and archaeal head-tail viruses. To date, there have been no reports on viruses infecting  
352 crenarchaeota (9, 44).

353

354 To predict the AGV1 integration site on the host genome, we performed a draft genome  
355 sequence analysis of the host. The draft assemblies of the *A. pernix* YK1-12-2013 genome yielded  
356 144 contigs with an average GC content of 56.5% (Table 2). The draft genome was approximately  
357 1.6 Mbp long, and a total of 1,727 ORFs were identified. However, we could not detect the AGV1  
358 integration site in the host genome or any sequence reads of the host mapped to the AGV1 genome,  
359 including tRNA<sup>Glu</sup>. That is to say, the read coverage of the AGV1 genome was lower than that of  
360 the host genome indicating that AGV1 was harbored by some host cells in culture. APOV1 and  
361 APSV1 harbor the SSV1-type integrase and are integrated into the chromosome of the host *A.*  
362 *pernix* K1 (15). In addition, *Fuselloviridae* members encode SSV1-type integrases and are  
363 integrated into the host chromosome (40). In contrast, *Bicaudaviridae* members, which also carry  
364 the SSV1-type integrase but integration of viral genome has not yet been reported except for  
365 ATV(13). Furthermore, a recent study revealed that the integrase gene is not essential for SSV1  
366 (45); thus, genome integration is not always essential for infection. We obtained a pure host cell  
367 culture using previous methods (22, 26) and confirmed no redundancy of 16S rRNA genes and  
368 housekeeping genes by Sanger sequencing and draft genome sequencing (data not shown but the  
369 sequences obtained by Sanger sequencing completely matched those of the draft genome).



370 Therefore, we presumed that AGV1 is not integrated into the host genome and maintained as a  
371 episome in the host cell and that initially, the host culture consisted of only AGV1-carrying cells,  
372 but AGV1-carrying cells were diluted upon host cell division as AGV1 could not replicate  
373 autonomously due to the lack of the ORBs or UCMs.

374

375 **Virus-host relationship.** To confirm the maintenance and replication of the AGV1 genome in host  
376 cells, we monitored the host/virus genome copy numbers during infection. AGV1 genome copy  
377 number was 5.6 to  $35 \times 10^3$  times lower than that of host genome, and replication did not occur  
378 without induction stimulus (Fig. 3). At 9 h post-treatment, AGV1 in the host cells rapidly increased.  
379 At 48 h post-treatment, its genome copy number reached approximately  $3$  to  $5 \times 10^8$  copies  $\text{mL}^{-1}$   
380 culture and exceeded that of host genomes by 9.5 to 26-fold. The AGV1 genome copy number in  
381 the supernatant exhibited a similar increasing pattern and plateaued at approximately  $3 \times 10^7$  copies  
382  $\text{mL}^{-1}$  culture at 72 h post-treatment. When it plateaued, AGV1 virions were observed in the cell  
383 free supernatant by TEM.

384 To clarify whether AGV1 infection affects host growth, we monitored host growth with or  
385 without AGV1 and under AGV1-induced conditions. Host growth was more significantly retarded  
386 following AGV1 inoculation than under AGV1-induced conditions. Growth retardation was  
387 observed immediately after AGV1 inoculation and 12 h post-induction, at which AGV1  
388 propagation in the host cell started (Fig. 4). Infection with AGV1 did not lead to host cell lysis as  
389 evidenced by a lack of decrease in  $\text{OD}_{600}$  and the absence of cell debris in the culture of infected  
390 cells.

391

392

393 ***Aeropyrum*–AGV1 interaction via the CRISPR/Cas system.** CRISPR is a microbial adaptive  
394 immune system that cleaves foreign genetic elements (46). CRISPR allows cells to specifically  
395 recognize the target sequences using spacers acquired from the proto-spacer (small DNA segment  
396 of invaders) and inhibits viral infection, such as RNA interference manner (47). To investigate the  
397 AGV1–host interaction via CRISPR, we identified the CRISPR loci on the host genome and  
398 spacers originating from AGV1. *A. pernix* YK1-12-2013 carried two CRISPR loci (Apyk\_1 and  
399 Apyk\_2) carrying 39 and 57 repeat-spacer units, respectively.

400 We detected *cas2* and *cas4* genes adjacent to Apyk\_2. *cas2* and *cas4* genes are important  
401 for insertion of spacers into CRISPR arrays. We also detected other *cas* genes involved in spacer  
402 acquisition (*cas1*), target binding (*csa2*, *cas5*, *cmr2*, and *cmr3*), and target cleavage (*cmr4*, *cmr6*,  
403 and *csx1*) in the draft genome (46). Direct repeat sequences and leader sequences of Apyk\_1 and  
404 Apyk\_2 were matched to the repeat sequences of Ape\_1 and Aca\_2 (25), which are previously  
405 reported CRISPR loci of *A. pernix* K1 and *A. camini* SY1, respectively. We found 8 protospacers  
406 on AGV1 (Table 4), 3 of which matched those on the CRISPR loci on the *A. pernix* YK1-12-2013  
407 genome, whereas the remaining five matched those of *A. pernix* K1. The sequence of the single  
408 spacer (Apyk\_2\_45) perfectly matched that of the protospacer. Other protospacers had at least one  
409 nucleotide mutation.

410 Next, the nucleotide mutations in the protospacers were examined to determine whether  
411 they caused synonymous substitutions. We found that most nucleotide mutations caused  
412 synonymous substitutions, except for Apyk\_2\_35. Apyk\_2\_35 contains a single amino acid  
413 substitution of isoleucine to valine; however, this residue was conserved, suggesting an arms race  
414 between AGV1 and the host. Our results suggest that CRISPR protects *A. pernix* YK1-12-2013  
415 from AGV1 infection.

416 Recent transcriptomic analysis of *S. solfataricus* infected with two closely related  
417 temperate viruses, SSV1 and SSV2, indicates that CRISPR interacts with the temperate virus and  
418 regulates its copy number (19). SSV2 showed a steep increase in copy number (from to 1–3 to 25–  
419 50 copies per cell) during host growth (48) and elicited a strong host response, including CRISPR  
420 (19). On the other hand, SSV1 maintained its copy number at a low level without any induction  
421 stimulus (18) and did not activate the host defense system (19). Furthermore, viruses with  
422 destructive effects on the host induce a stronger host defense response as evidenced by the high  
423 numbers of spacer matches to lytic virus ATV found in the CRISPR loci of *S. solfataricus* P2  
424 compared with carrier-state viruses (e.g., fuselloviruses infecting the strain) (9). Thus, we assumed  
425 that the CRISPR/Cas immunity of *A. pernix* YK1-12-2013 represses AGV1 propagation because  
426 high concentrations of AGV1 might have damaging effects on host growth. Alternatively, AGV1  
427 might be in the cryptic phase during the optimal growth phase of the host to escape from the host  
428 defense. However, AGV1 can propagate steeply upon certain stress stimuli, such as addition of the  
429 virus storage buffer. The detailed mechanism of AGV1 life cycle remains to be elucidated.

430  
431 **Factors associated with AGV1 induction.** To identify the AGV1 induction stimulus, we  
432 examined AGV1 propagation under various stress conditions. PCR products of AGV1 were  
433 obtained in cells growing under stress conditions stimulated, namely suboptimal growth pH,  
434 suboptimal growth temperature, and UV irradiation (Fig. 5) besides tris addition. Salinity shift and  
435 addition of chelating agent didn't induce AGV1 propagation. AGV1 genome copy number was  
436 approximately measured as  $1 \times 10^3$  copies mL<sup>-1</sup> cultures under suboptimal growth pH, suboptimal  
437 growth temperature and UV irradiation. The addition of tris-acetate buffer induced approximately  
438  $1 \times 10^8$  copies mL<sup>-1</sup> and was the most effective stimulus to induce AGV1 propagation.

439

440 **Host range analysis.** The host range of AGV1 was evaluated by inoculating AGV1 with  
441 exponentially growing cells of five *Aeropyrum* strains isolated from various hydrothermal fields  
442 in Japan. We did not detect the AGV1 genome in all cultures of OH2, TB7, and FT1-29-2014  
443 strains. In *A. pernix* K1, we detected the AGV1 genome at a low level ( $4.8$  to  $7.0 \times 10^2$  copies mL<sup>-1</sup>)  
444 in cultures A and C. In *A. camini* SY1, we detected the AGV1 genome at  $1.0 \times 10^6$  copies mL<sup>-1</sup>  
445 in culture B and at  $5.5 \times 10^6$  copies mL<sup>-1</sup> in culture C. 16S rRNA gene was detected in all cultures  
446 at approximately  $10^5$  copies mL<sup>-1</sup>.

447 Thus, *A. pernix* K1 and *A. camini* SY1 could be infected by AGV1. We continued to  
448 subculture both AGV1-infected strains and after 10-time subculturing, we performed qPCR  
449 targeting AGV1 integrase. However, we could not detect the AGV1 genome in cultures with or  
450 without the virus storage buffer. Similarly, the *Sulfolobus neozealandicus* droplet-shaped virus  
451 belonging to *Guttaviridae* was found in an unstable carrier state (16). In contrast, we did not obtain  
452 any AGV1-free strain of the native host, *A. pernix* YK1-12-2013, despite long-term subculturing  
453 and effort to curation by plating and limiting dilution. Elucidation of the detailed mechanism  
454 should be explored in future studies.

455

456

457 Overall, we successfully isolated a novel spherical temperate virus AGV1 that infects the  
458 hyperthermophilic archaeon *Aeropyrum*. AGV1 was morphologically similar to *Globuloviridae*  
459 viruses but doesn't share any genes with them. According to the genetic information, AGV1  
460 seemed to be a temperate virus but AGV1 couldn't neither integrate into the host genome nor  
461 replicate autonomously. On the other hand, AGV1 could propagate with inducing stimulus in spite  
462 of threat of the host CRISPR/Cas system. Although an "unstable carrier state" of AGV1 seemed

463 to be disadvantageous for the survival, it might be a reasonable way to adapt to the host defense  
464 system and the harsh environment of the host habitat. We hypothesize AGV1 could hide from  
465 host defense system by unstable carrier state without inducing stimulus and propagate steeply on  
466 detecting stressful condition for its host. These results and hypothesis shed new light on virus-host  
467 interaction under extreme environment.

468

469 **ACKNOWLEDGMENTS.** Computational analysis was performed at the Super Computer  
470 System, Institute for Chemical Research, Kyoto University. We thank the Center for Anatomical,  
471 Pathological, and Forensic Medical Researches (Graduate School of Medicine, Kyoto University)  
472 for their technical assistance with transmission electron microscopy. We also thank Takashi  
473 Daifuku and Shin Fujiwara for their assistance in host isolation experiments and genomic analysis.  
474 The authors declare that they have no conflicts of interest. This work was supported by a Grant-  
475 in-Aid for Challenging Exploratory Research (grant number 26640112) from the Japan Society for  
476 the Promotion of Science. The funders had no role in study design, data collection and  
477 interpretation, or the decision to submit the work for publication. We would like to thank Editage  
478 ([www.editage.com](http://www.editage.com)) for English language editing.

479

## 480 REFERENCES

- 481 1. **Van Valen L.** 1974. Molecular evolution as predicted by natural selection. *J Mol Evol*  
482 **3**:89–101.
- 483 2. **Paterson S, Vogwill T, Buckling A, Benmayor R, Spiers AJ, Thomson NR, Quail M,**  
484 **Smith F, Walker D, Libberton B, Fenton A, Hall N, Brockhurst MA.** 2010.  
485 Antagonistic coevolution accelerates molecular evolution. *Nature* **464**:275–278.

- 486 3. **Rodriguez-Valera F, Martin-Cuadrado A-B, Rodriguez-Brito B, Pasić L, Thingstad**  
487 **TF, Rohwer F, Mira A.** 2009. Explaining microbial population genomics through phage  
488 predation. *Nat Rev Microbiol* **7**:828–36.
- 489 4. **Breitbart M, Thompson L, Suttle C, Sullivan M.** 2007. Exploring the Vast Diversity of  
490 Marine Viruses. *Oceanography* **20**:135–139.
- 491 5. **Weinbauer MG, Rassoulzadegan F.** 2004. Are viruses driving microbial diversification  
492 and diversity? *Environ Microbiol* **6**:1–11.
- 493 6. **Salmond, George PC, and Peter C. Fineran.** 2015 "A century of the phage: past, present and  
494 future." *Nat Rev Microbiol* **13.12**: 777-786.
- 495 7. **Diana P. Baquero, Ying Liu, Fengbin Wang, Edward H. Egelman, David Prangishvili,**  
496 **Mart Krupovic.** 2020. Chapter Four - Structure and assembly of archaeal viruses.  
497 *Advances in Virus Research.* **108**:127-164.
- 498 8. **Prangishvili D.** 2013. The wonderful world of archaeal viruses. *Annu Rev Microbiol*  
499 **67**:565–85.
- 500 9. **Prangishvili D, Forterre P, Garrett R a.** 2006. Viruses of the Archaea: a unifying view.  
501 *Nat Rev Microbiol* **4**:837–848.
- 502 10. **Dy, R. L., Richter, C., Salmond, G. P., & Fineran, P. C.** 2014. Remarkable mechanisms  
503 in microbes to resist phage infections. *Annu rev virol* **1**, 307-331.
- 504 11. **Janekovic D, Wunderl S, Holz I, Zillig W, Gierl A, Neumann H.** 1983. TTV1, TTV2  
505 and TTV3, a Family of Viruses of the Extremely Thermophilic, Anaerobic, Sulfur  
506 Reducing Archaeobacterium *Thermoproteus tenax*. *Mol Gen Genet* **192**:39–45.
- 507 12. **Maaty WS, Ortmann AC, Dlakic M, Schulstad K, Hilmer JK, Liepold L, Weidenheft**  
508 **B, Khayat R, Douglas T, Young MJ, Bothner B.** 2006. Characterization of the archaeal

- 509 thermophile Sulfolobus turreted icosahedral virus validates an evolutionary link among  
510 double-stranded DNA viruses from all domains of life. *J Virol* **80**:7625–7635.
- 511 13. **Prangishvili D, Vestergaard G, Häring M, Aramayo R, Basta T, Rachel R, Garrett**  
512 **RA.** 2006. Structural and Genomic Properties of the Hyperthermophilic Archaeal Virus  
513 ATV with an Extracellular Stage of the Reproductive Cycle. *J Mol Biol* **359**:1203–1216.
- 514 14. **Krupovic M, Quemin ERJ, Bamford DH, Forterre P, Prangishvili D.** 2014.  
515 Unification of the globally distributed spindle-shaped viruses of the Archaea. *J Virol*  
516 **88**:2354–8.
- 517 15. **Mochizuki T, Sako Y, Prangishvili D.** 2011. Provirus induction in hyperthermophilic  
518 archaea: characterization of Aeropyrum pernix spindle-shaped virus 1 and Aeropyrum  
519 pernix ovoid virus 1. *J Bacteriol* **193**:5412–5419.
- 520 16. **Arnold HP, Ziese U, Zillig W.** 2000. SNDV, a novel virus of the extremely thermophilic  
521 and acidophilic archaeon Sulfolobus. *Virology* **272**:409–416.
- 522 17. **Muskhelishvili G, Palm P, Zillig W.** 1993. SSV1-encoded site-specific recombination  
523 system in Sulfolobus shibatae. *MGG Mol Gen Genet* **237**:334–342.
- 524 18. **Martin A, Yeats S, Janekovic D, Reiter W, Aicher W, Zillig W.** 1984. SAV1, a  
525 temperate u.v.-inducible DNA virus-like particle from the archaebacterium Sulfolobus  
526 acidocaldarius isolate B12. *EMBO J* **3**:2165–2168.
- 527 19. **Fusco S, Liguori R, Limauro D, Bartolucci S, She Q, Contursi P.** 2015. Transcriptome  
528 analysis of Sulfolobus solfataricus infected with two related fuselloviruses reveals novel  
529 insights into the regulation of CRISPR-Cas system. *Biochimie* **118**:322–332.
- 530 20. **Fusco S, She Q, Bartolucci S, Contursi P.** 2013. T(lys), a newly identified Sulfolobus  
531 spindle-shaped virus 1 transcript expressed in the lysogenic state, encodes a DNA-binding

- 532 protein interacting at the promoters of the early genes. *J Virol* **87**:5926–36.
- 533 21. **Sako Y, Nomura N, Uchida A, Ishida Y, Morii H, Koga Y, Hoaki T, Maruyama T.**  
534 1996. *Aeropyrum pernix* gen. nov., sp. nov., a Novel Aerobic Hyperthermophilic  
535 Archaeon Growing at Temperatures up to 100°C. *Int J Syst Bacteriol* **46**:1070–1077.
- 536 22. **Nakagawa S, Takai K, Horikoshi K, Sako Y.** 2004. *Aeropyrum camini* ap. nov., a  
537 strictly aerobic, hyperthermophilic archaeon from a deep-sea hydrothermal vent chimney.  
538 *Int J Syst Evol Microbiol* **54**:329–335.
- 539 23. **Mochizuki T, Yoshida T, Tanaka R, Forterre P, Sako Y, Prangishvili D.** 2010.  
540 Diversity of viruses of the hyperthermophilic archaeal genus *Aeropyrum*, and isolation of  
541 the *Aeropyrum pernix* bacilliform virus 1, APBV1, the first representative of the family  
542 Clavaviridae. *Virology* **402**:347–354.
- 543 24. **Mochizuki T, Krupovic M, Pehau-Arnaudet G, Sako Y, Forterre P, Prangishvili D.**  
544 2012. Archaeal virus with exceptional virion architecture and the largest single-stranded  
545 DNA genome. *Proc Natl Acad Sci U S A* **109**:13386–91.
- 546 25. **Daifuku T, Yoshida T, Kitamura T, Kawaichi S, Inoue T, Nomura K, Yoshida Y,**  
547 **Kuno S, Sako Y.** 2013. Variation of the virus-related elements within syntenic genomes  
548 of the hyperthermophilic archaeon *aeropyrum*. *Appl Environ Microbiol* **79**:5891–5898.
- 549 26. **Nomura N, Morinaga Y, Kogishi T, Kim EJ, Sako Y, Uchida A.** 2002. Heterogeneous  
550 yet similar introns reside in identical positions of the rRNA genes in natural isolates of the  
551 archaeon *Aeropyrum pernix*. *Gene* **295**:43–50.
- 552 27. **Zerbino DR, Birney E.** 2008. Velvet: Algorithms for de novo short read assembly using  
553 de Bruijn graphs. *Genome Res* **18**:821–829.
- 554 28. **Tamura K, Dudley J, Nei M, Kumar S.** 2007. MEGA4: Molecular Evolutionary



- 555 Genetics Analysis (MEGA) software version 4.0. *Mol Biol Evol* **24**:1596–1599.
- 556 29. **Sugawara H, Ohyama A, Mori H, Kurokawa K.** Microbial Genome Annotation  
557 Pipeline (MiGAP) for diverse users.
- 558 30. **Finn RD, Clements J, Eddy SR.** 2011. HMMER web server: Interactive sequence  
559 similarity searching. *Nucleic Acids Res* **39**.
- 560 31. **Finn RD, Bateman A, Clements J, Coggill P, Eberhardt RY, Eddy SR, Heger A,**  
561 **Hetherington K, Holm L, Mistry J, Sonnhammer ELL, Tate J, Punta M.** 2014. Pfam:  
562 The protein families database. *Nucleic Acids Res*.
- 563 32. **Krogh a, Larsson B, von Heijne G, Sonnhammer E.** 2001. Predicting transmembrane  
564 protein topology with a hidden Markov model: application to complete genomes. *J Mol*  
565 *Biol* **305**:567–580.
- 566 33. **Carver T, Thomson N, Bleasby A, Berriman M, Parkhill J.** 2009. DNAPlotter: circular  
567 and linear interactive genome visualization. *Bioinforma Appl NOTE* **25**:119–12010.
- 568 34. **Nishimura, Y., Yoshida, T., Kuronishi, M., Uehara, H., Ogata, H., & Goto, S.** 2017.  
569 ViPTree: the viral proteomic tree server. *Bioinformatics* **33(15)**, 2379-2380.
- 570 35. **Langmead B, Salzberg SL.** 2012. Fast gapped-read alignment with Bowtie 2. *Nat*  
571 *Methods* **9**:357–359.
- 572 36. **Grissa I, Vergnaud G, Pourcel C.** 2007. CRISPRFinder: a web tool to identify clustered  
573 regularly interspaced short palindromic repeats. *Nucleic Acids Res* **36**:52–57.
- 574 37. **Einen J, Thorseth IH, Øvreås L.** 2008. Enumeration of Archaea and Bacteria in seafloor  
575 basalt using real-time quantitative PCR and fluorescence microscopy. *FEMS Microbiol*  
576 *Lett* **282**:182–187.
- 577 38. **Häring M, Peng X, Brügger K, Rachel R, Stetter KO, Garrett RA, Prangishvili D.**

- 578 2004. Morphology and genome organization of the virus PSV of the hyperthermophilic  
579 archaeal genera *Pyrobaculum* and *Thermoproteus*: A novel virus family, the  
580 Globuloviridae. *Virology* **323**:233–242.
- 581 39. **Ahn DG, Kim S II, Rhee JK, Pyo Kim K, Pan JG, Oh JW.** 2006. TTSV1, a new virus-  
582 like particle isolated from the hyperthermophilic crenarchaeote *Thermoproteus tenax*.  
583 *Virology* **351**:280–290.
- 584 40. **Wang H, Peng N, Shah S a, Huang L, She Q.** 2015. Archaeal Extrachromosomal  
585 Genetic Elements. *Microbiol Mol Biol Rev* **79**:117–152.
- 586 41. **Iranzo J, Koonin E V, Prangishvili D, Krupovic M.** 2016. Bipartite network analysis of  
587 the archaeal virosphere: evolutionary connections between viruses and capsid-less mobile  
588 elements. *J Virol* **90**:11043–11055.
- 589 42. **Xavier Gomis-Rüth F, Solà M, Acebo P, Párraga A, Guasch A, Eritja R, González A,**  
590 **Espinosa M, Solar G Del, Coll M.** 1998. The structure of plasmid-encoded  
591 transcriptional repressor CopG unliganded and bound to its operator. *EMBO J* **17**:7404–  
592 7415.
- 593 43. **Prangishvili D, Garrett RA, Koonin E V.** 2006. Evolutionary genomics of archaeal  
594 viruses: Unique viral genomes in the third domain of life. *Virus Res* **117**:52–67.
- 595 44. **Hatfull GF.** Bacteriophage Genomics.
- 596 45. **Clore AJ, Stedman KM.** 2007. The SSV1 viral integrase is not essential. *Virology*  
597 **361**:103–111.
- 598 46. **Makarova KS, Wolf YI, Alkhnbashi OS, Costa F, Shah SA, Saunders SJ, Barrangou**  
599 **R, J Brouns SJ, Charpentier E, Haft DH, Horvath P, Moineau S, M Mojica FJ,**  
600 **Terns RM, Terns MP, White MF, Yakunin AF, Garrett RA, van der Oost J,**

- 601           **Backofen R, Koonin E V.** 2015. The CRISPR–Cas modules are adaptive immune sys-  
602           tems that are present in most archaea and many bacte- ria. *Nat Publ Gr* **13**.
- 603   47.   **Reiter WD, Palm P.** 1990. Identification and characterization of a defective SSV1  
604           genome integrated into a transfer-RNA gene in the archaeobacterium *Sulfolobus* sp B12.  
605           *Mol Gen Genet* **221**:65–71.
- 606   48.   **Contursi P, Jensen S, Aucelli T, Rossi M, Bartolucci S, She Q.** 2006. Characterization  
607           of the *Sulfolobus* host-SSV2 virus interaction. *Extremophiles* **10**:615–627.
- 608
- 609

610 **Figure Legends**

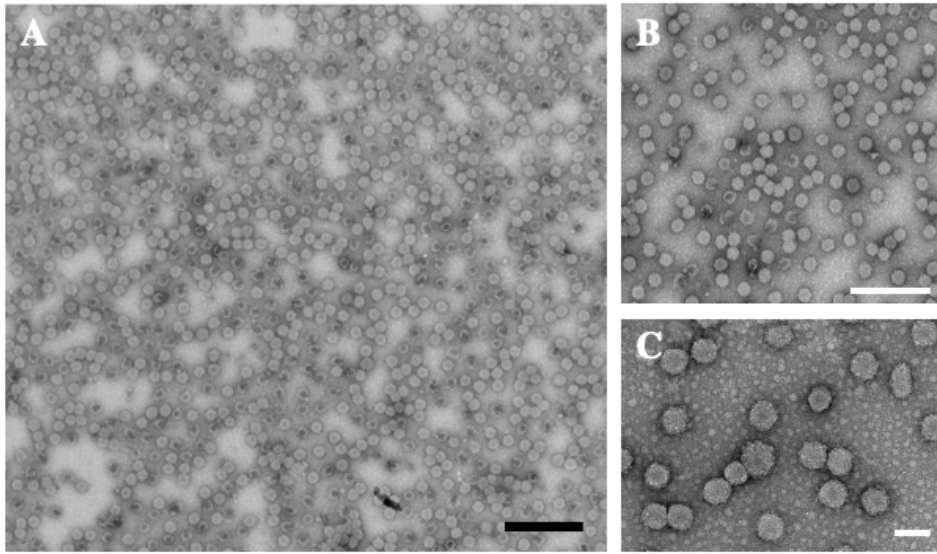

611

612 **Fig. 1 Morphology of AGV1 virions.** Representative transmission electron micrographs of virus

613 particles derived from *A. pernix* YK1-12-2013 cultures grown with buffer A. Cells are negatively

614 stained with 1% uranyl acetate. Scale bars: 500 nm (A, B) and 100 nm (C).

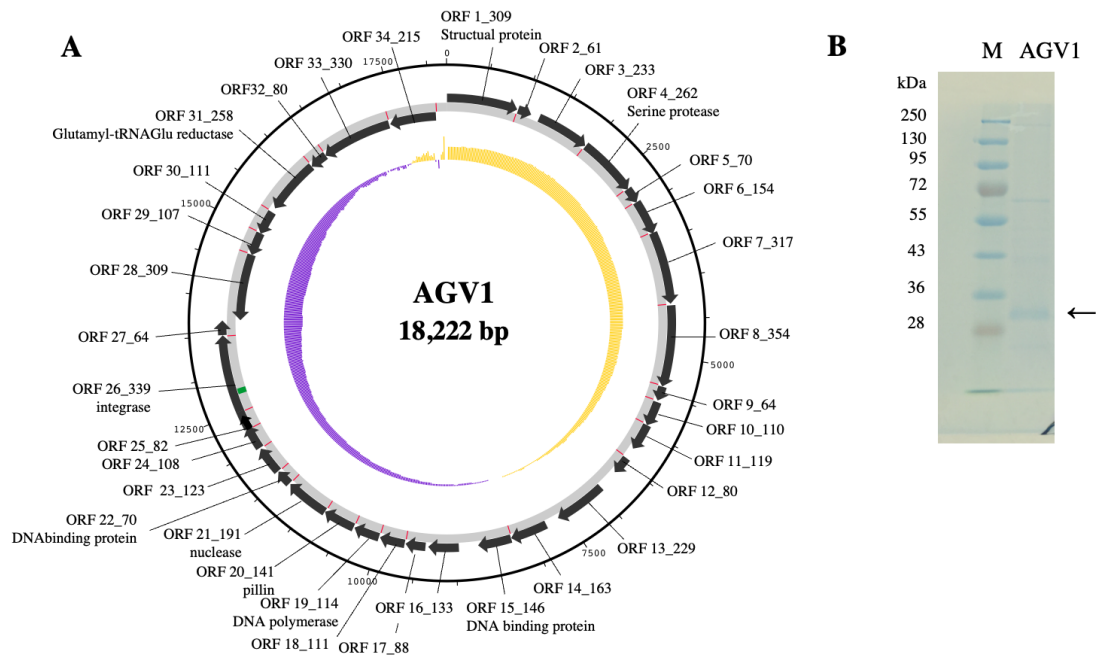

615

C

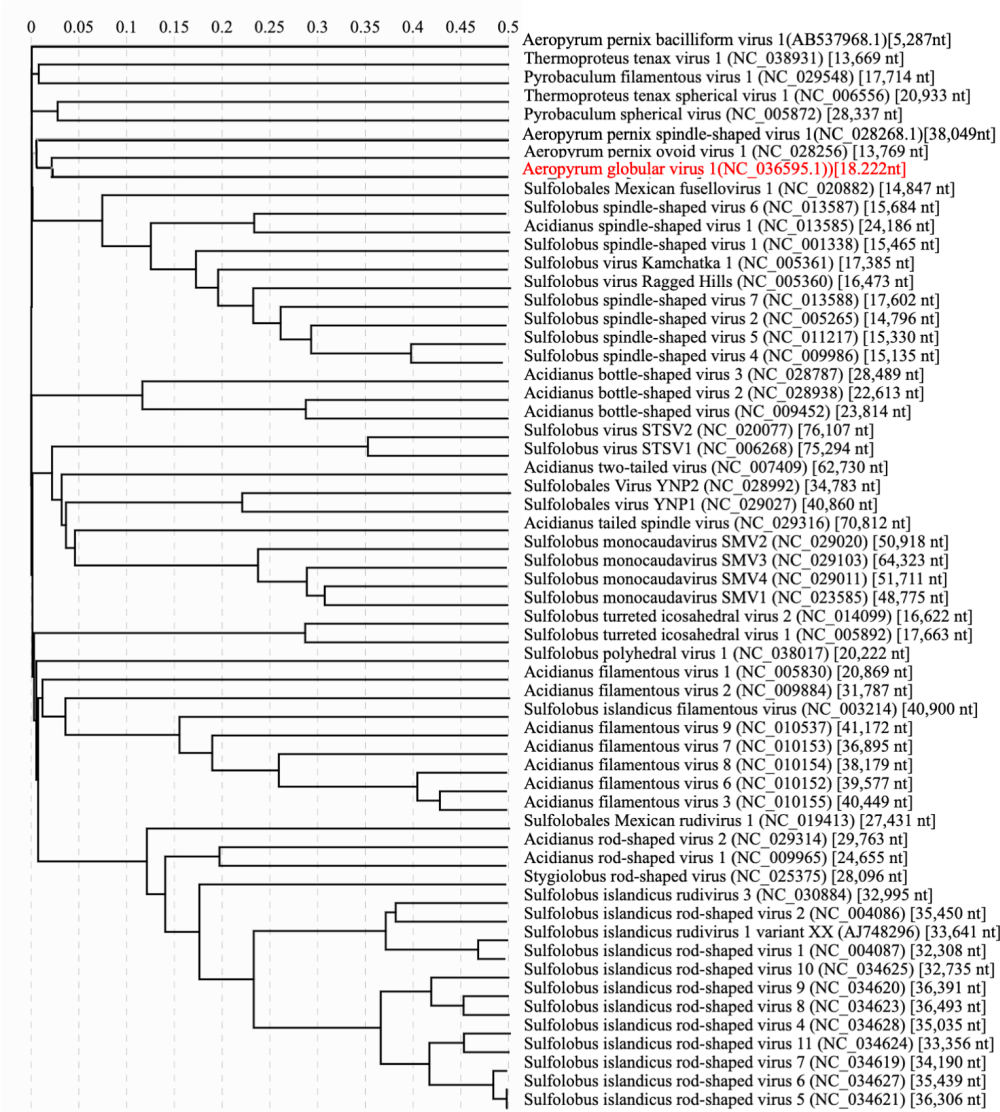

616

617 **Fig. 2 Genomic information of AGV1.** (A) Genome map of AGV1. Outer ring shows the genomic

618 contents: black arrows, ORFs with strand orientation; red, ribosome-binding site; and green,

619 tRNA<sup>Glu</sup> gene. Inner ring shows the GC skew (window size: 9000 and step size: 25): purple,

620 negative GC skew; yellow, positive GC skew. Replication origin is located at the intergenic region

621 between ORF1\_309 and ORF34\_215. (B) Structural protein of AGV1. Representative SDS-PAGE

622 gel shows the proteins of the virions stained with CBB stain one. Molecular mass marker (M) are  
623 shown. The arrow indicates the viral major protein identified. (C) Phylogenetic tree of the genetic  
624 relationship among crencarchaeal viruses based on genome-wide sequence similarities computed  
625 by tBLASTx. The tree was generated by ViPTree. SG values are shown in top row.  
626

627

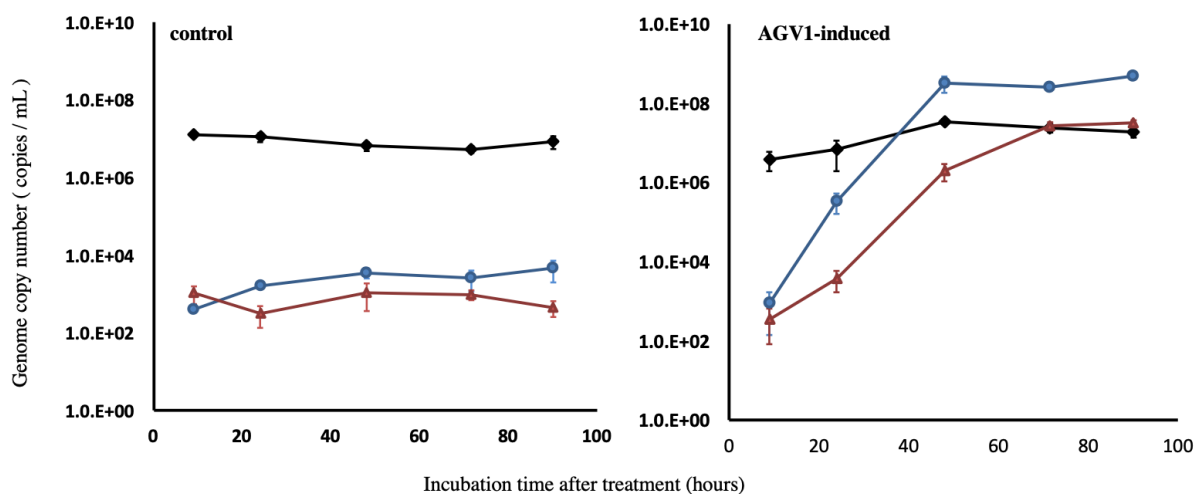

628

629 **Fig. 3 Time-course of AGV1 and host genome copy numbers.** Native host *A. pernix* YK1-12-

630 2013 was cultivated at 90°C, and samples were collected at the indicated time points. The host

631 genome copy numbers (black diamond) and the virus genome copy numbers in the cell pellet (blue

632 circle) and supernatant (red triangle) from 10 mL culture of *A. pernix* YK1-12-2013 were measured

633 using quantitative PCR analysis of the DNA extracted from the host cells and released virions,

634 respectively. Error bars represent the mean  $\pm$  SE of triplicates.



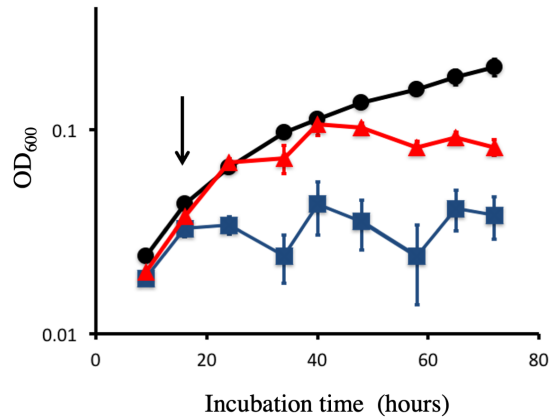

635

636 **Fig. 4 Effect of AGV1 on the growth of *A. pernix* YK1-12-2013 strain.** Black circles, red

637 triangles, and blue squares indicate the control, tris-acetate buffer-added culture, and AGV1

638 fraction-added culture. The AGV1 fraction or tris-acetate buffer was added at the time indicated

639 by the arrow. Error bars represent the mean  $\pm$  SE of six replicates.

640

641

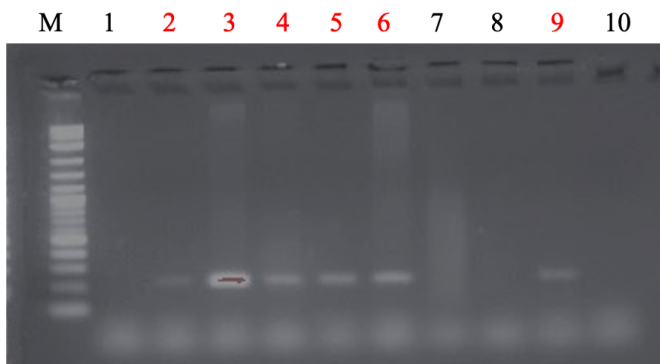

642

643 **Fig. 5 AGV1 Induction assay.** PCR analysis was performed using AGV1-specific primers to

644 confirm the kind of stress induced by AGV1 propagation. M: 2 log ladder, 1-9: YK1-12-2013

645 genome extracted from cells under various stress treatments: 1: optimal, 2: addition of 20 mM tris-

646 acetate buffer, 3: addition of 50 mM tris-acetate buffer, 4: addition of 100 mM tris-acetate buffer,

647 5: UV irradiation for 30 s, 6: suboptimal growth temperature, 7: addition of 20 mM EDTA (pH

648 7.0), 8: high salinity, 9: suboptimal growth pH, and 10: DDW (negative control). The lanes

649 confirming product amplification are in red.

650

651 **Tables**

652 **Table 1 Primers used in this study**

| Primer name | Sequence (5'→3')     | Length (bp) | Usage                            | Reference         |
|-------------|----------------------|-------------|----------------------------------|-------------------|
| 931f        | AGGAATTGGCGGGGGAGCA  | 19          | real time PCR for 16S rDNA       | Einen et al. 2008 |
| m1100r      | BGGGTCTCGCTCGTTRCC   | 18          | real time PCR for 16S rDNA       | Einen et al. 2008 |
| IntF        | AGGCCCTAGGATTCAACGGA | 20          | real time PCR for AGV1 integrase | This study        |
| IntR        | CACGTGACCTCAGGGTCATT | 20          | real time PCR for AGV1 integrase | This study        |

653

654

655 **Table 2 Sequence status of the host and AGV1 genomes**

| Characteristics    | AGV1   | <i>A. pernix</i><br>YK1-12-2013 |
|--------------------|--------|---------------------------------|
| Genome size (bp)   | 18,222 | 1,601,052                       |
| GC content (%)     | 55.8   | 56.5                            |
| No. of contigs     | 1      | 144                             |
| Total no. of genes | 35     | 1,772                           |
| No. of RNA genes   | 1      | 45                              |
| No. of ORFs        | 34     | 1,727                           |

656

657

658

659  
660

**Table 3 Summary of the predicted ORFs in the AGV1 genome**

|           | position     | Length (aa) | Function            | HMM predictions                                                                    | BLASTP Hit                                                  | Identity (%) | E-value  |
|-----------|--------------|-------------|---------------------|------------------------------------------------------------------------------------|-------------------------------------------------------------|--------------|----------|
| ORF1_309  | 1..930       | 309         | Structural protein* |                                                                                    |                                                             |              |          |
| ORF2_61   | 936..1121    | 61          |                     |                                                                                    |                                                             |              |          |
| ORF3_233  | 1227..1928   | 233         |                     |                                                                                    |                                                             |              |          |
| ORF4_262  | 1930..2718   | 262         | serine protease     | Trypsin-like peptidase domain (aa 57-197 hit to PF13365.4; 3.6e-21)                | <i>Pyrodictium</i> sp (ref HID40799.1)                      | 64/182(35%)  | 1.00E-23 |
| ORF5_70   | 2708..2920   | 70          |                     |                                                                                    |                                                             |              |          |
| ORF6_154  | 2913..3377   | 154         |                     |                                                                                    |                                                             |              |          |
| ORF7_317  | 3361..4314   | 317         |                     |                                                                                    |                                                             |              |          |
| ORF8_354  | 4329..5393   | 354         |                     |                                                                                    |                                                             |              |          |
| ORF9_64   | 5390..5584   | 64          |                     |                                                                                    |                                                             |              |          |
| ORF10_110 | 5600..5932   | 110         |                     |                                                                                    |                                                             |              |          |
| ORF11_119 | 5925..6284   | 119         |                     |                                                                                    |                                                             |              |          |
| ORF12_80  | 6427..6669   | 80          |                     |                                                                                    |                                                             |              |          |
| ORF13_229 | 6927..7616   | 229         |                     |                                                                                    |                                                             |              |          |
| ORF14_163 | 7784..8275   | 163         |                     |                                                                                    |                                                             |              |          |
| ORF15_146 | 8272..8712   | 146         | DNA binding (RHH)   | Ribbon-helix-helix protein, copG family (aa 111-147 hit to PF1402.21; 4.6e-07)     |                                                             |              |          |
| ORF16_133 | 8957..9358   | 133         |                     |                                                                                    |                                                             |              |          |
| ORF17_88  | 9388..9654   | 88          |                     |                                                                                    |                                                             |              |          |
| ORF18_111 | 9660..9995   | 111         |                     | Uncharacterized protein conserved in bacteria (aa 3-109 hit to PF09995.9; 3.2e-06) | <i>Aeropyrum pernix</i> ovoid virus 1 (ref WP_010865925.1 ) | 70/111(63%)  | 1.00E-42 |
| ORF19_114 | 10003..10347 | 114         | DNA polymerase      | DNA polymerase alpha subunit p180 N terminal (aa13-69 hit to PF12255.8; 1.8e-06)   |                                                             |              |          |

|           |                          |     |                            |                                                                                        |                                                                     |              |           |
|-----------|--------------------------|-----|----------------------------|----------------------------------------------------------------------------------------|---------------------------------------------------------------------|--------------|-----------|
| ORF20_141 | 10355..10780             | 141 | pillin                     | Archaeal Type IV pilin, N-terminal (aa 4-93 hit to PF07790.11; 1.0e-08)                | <i>Thermogladius calderae</i> 1633 (ref AFK51634.1 )                | 59/151(39%)  | 9.00E-19  |
| ORF21_191 | 10777..11352             | 191 | nuclease                   | Viral/Archaeal nuclease (aa 22-175 hit to PF12187.8; 3.3e-13)                          | <i>Pyrodictium delaneyi</i> (ref WP_082419610.1 )                   | 75/180(42%)  | 2.00E-28  |
| ORF22_70  | 11363..11575             | 70  | DNA binding (RHH)          | Ribbon-helix-helix protein, copG family (aa 21-58 hit to PF01402.21; 5.0e-10)          | <i>Aeropyrum pernix</i> spindle-shaped virus 1 (ref YP009177778.1 ) | 45/69(65%)   | 5.00E-24  |
| ORF23_123 | 11578..11949             | 123 |                            |                                                                                        |                                                                     |              |           |
| ORF24_108 | 11959..12285             | 108 |                            | HemN C-terminal domain (aa 9-77 hit to PF06969.16; 1.9e-06)                            |                                                                     |              |           |
| ORF25_82  | 12248..12496             | 82  |                            | TIR domain (aa 4-60 hit to PF13676.6; 1.4e-06)                                         | <i>Aeropyrum pernix</i> (ref WP_131159643.1 )                       | 51/86(59%)   | 3.00E-26  |
| ORF26_339 | 12493..13512             | 339 | integrase                  | Archaeal phage integrase (aa 180-333 hit to PF16795.5; 2.4e-40)                        | <i>Sulfolobus</i> spindle-shaped virus 1 (ref NP_039778.1 )         | 117/333(35%) | 1.00E-44  |
| ORF27_64  | 13509..13703             | 64  |                            |                                                                                        |                                                                     |              |           |
| ORF28_309 | complement(13710..14639) | 309 | ATP binding protein        | P-loop containing region of AAA domain (aa 28-65 hit to PF13555.6; 1.7e-06)            | <i>Pyrodictium</i> sp.(ref HID41144.1 )                             | 142/249(57%) | 9.00E-93  |
| ORF29_107 | complement(14642..14965) | 107 |                            |                                                                                        |                                                                     |              |           |
| ORF30_111 | complement(14967..15302) | 111 |                            |                                                                                        |                                                                     |              |           |
| ORF31_258 | complement(15377..16153) | 258 | Glutamyl-tRNAGlu reductase | Glutamyl-tRNAGlu reductase, dimerisation domain (aa 64-143 hit to PF00745.20; 1.3e-06) | <i>Aeropyrum pernix</i> ovoid virus (WP_010865937.1)                | 189/258(73%) | 2.00E-133 |
| ORF32_80  | complement(16160..16402) | 80  |                            |                                                                                        |                                                                     |              |           |
| ORF33_330 | complement(16407..17399) | 330 |                            |                                                                                        | <i>Thermoprotei archaeon</i> (ref RLE66374.1 )                      | 42/106(40%)  | 7.00E-08  |
| ORF34_215 | complement(17421..18068) | 215 |                            |                                                                                        |                                                                     |              |           |

662 **Table 4 Comparison of spacer sequences to identify putative protospacers**

| Strain                                 | Spacer or virus gene <sup>a</sup> | Nucleotide Sequence <sup>b</sup>                 | Predicted amino acid sequence <sup>b</sup> |
|----------------------------------------|-----------------------------------|--------------------------------------------------|--------------------------------------------|
| <i>Aeropyrum pernix</i><br>K1          | NC_000854_2_5*                    | TGAGGTTGAGGCCCGTAACAGGGCCGAGCTGGCCAGGCT          | EVEARNRAELAR                               |
|                                        | AGV1_5                            | T                                                |                                            |
|                                        | NC_000854_3_26                    | TCGAGCACTTCCAGGCCGACAGGCCCTGGCCAGGCTTGAGAACGGCAG | EHFQAAGLARLENG                             |
|                                        | AGV1_4                            | G T   T T                                        |                                            |
|                                        | NC_000854_3_29*                   | ATATCCACTAGGTGGTAGACCTGCGAGGCCGTGGACTG           | VHASQVYHLVD                                |
|                                        | AGV1_28                           | G    A                                           |                                            |
| <i>Aeropyrum pernix</i><br>YK1-12-2013 | NC_000854_3_38                    | TACAACCTCCTCAGGTGGCTCGCAGCATAACGGCCCCGT          | YNFLRWLAAYGP                               |
|                                        | AGV1_21                           | G     C C                                        |                                            |
|                                        | NC_000854_3_37                    | CTAGCCCCCTGCTGGCCCTGCTCCTAG                      | LAPLLALLL                                  |
| AGV1_1                                 | A                                 |                                                  |                                            |
| <i>Aeropyrum pernix</i><br>YK1-12-2013 | CRISPR2_45                        | AGGAGTGCGGACTACTACTACAGACCCGGATATAGGGG           | RSADYTTDPDIG                               |
|                                        | AGV1_8                            |                                                  |                                            |
|                                        | CRISPR2_37*                       | CACGTGGTGGATACTTGCGACACTATAACAGGTGTTC            | HVVDTCDTITGV                               |
|                                        | AGV1_4                            |                                                  |                                            |
|                                        | CRISPR2_35*                       | GGTACCAGCAGGCTGCGCAGGTTACGCCCGCCGCT              | GGGLNLRSLLI                                |
|                                        | AGV1_33                           | <b>T</b>                                         | <b>V</b>                                   |

*a* In each row, the spacer (top) and the corresponding putative protospacer (bottom) are shown.  
*b* Identical nucleotides and amino acids are indicated by vertical lines. Nonsynonymous substitutions are shown in boldface.

\* A reverse complementary sequence is shown.
